# Supplementary material for: A micropatterned cell array with an integrated oxygen -sensitive fluorescent membrane
Source: Royal Society of Chemistry journal article supplement (doi:10.1039/b9pp00061e), 2009-09-30

Supplemental Figure 1: Oxygen-sensitive membrane synthesis and cell patterning process by photocatalytic lithography.

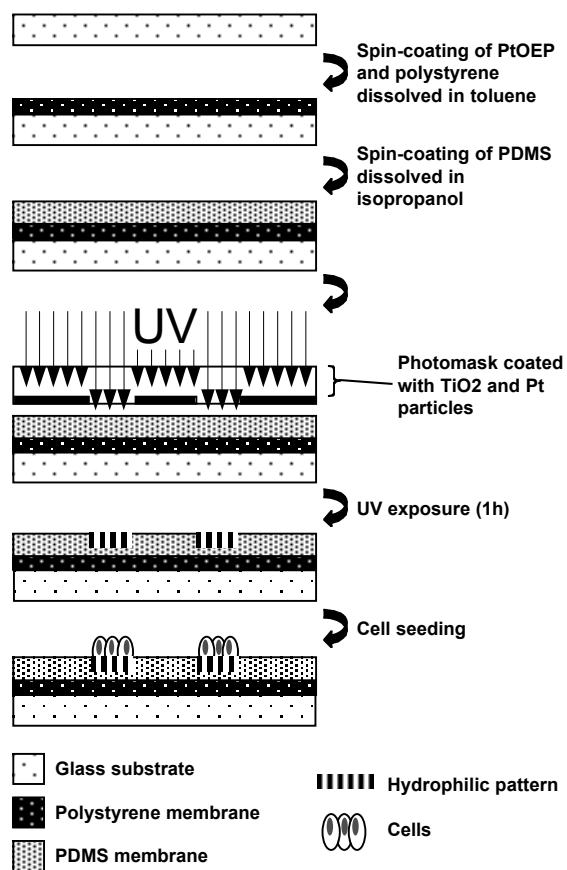

Supplement: b9pp00061e.pdf [file b9pp00061e.pdf]
